# Supplementary material
Source: PubMed Central journal article supplement (PMC5498365)
Supplement: 13205_2017_864_MOESM1_ESM.pdf [file 13205_2017_864_MOESM1_ESM.pdf]

### **3 Biotech**

#### **Diversity and functional properties of acid tolerant bacteria isolated from Tea plantation soil of Assam**

**Authors:** Gunajit Goswami<sup>1,2</sup>, Priyadarshini Deka<sup>1</sup>, Pompe Das<sup>1</sup>, Sudipta Sankar Bora<sup>1</sup>, Ramkrishna Samanta<sup>2</sup>, Robin Chandra Boro<sup>1</sup>,

Madhumita Barooah<sup>1\*</sup>

<sup>1</sup>Department of Agricultural Biotechnology, Assam Agricultural University, Jorhat-785013, Assam, India

<sup>2</sup>Department of Life-Sciences, Dibrugarh University, Dibrugarh-786004, Assam, India

**\*Corresponding author's Email:** [m17barooah@yahoo.co.in](mailto:m17barooah@yahoo.co.in)

**Table S1: Biochemical and Carbohydrate utilization (API 50CHB and API20E) profile of the isolates**

| <sup>a</sup> Tests | ISOLATES |      |      |    |    |    |    |    |    |     |     |     |     |     |     |
|--------------------|----------|------|------|----|----|----|----|----|----|-----|-----|-----|-----|-----|-----|
|                    | API20E   |      |      |    |    |    |    |    |    |     |     |     |     |     |     |
|                    | G1       | . G2 | . G3 | G4 | G5 | G6 | G7 | G8 | G9 | G10 | G11 | G12 | G13 | G14 | G15 |
| Catalase           | +        | +    | +    | +  | +  | +  | +  | +  | +  | +   | +   | +   | +   | +   | +   |
| ONPG               | +        | +    | +    | +  | +  | +  | +  | +  | +  | +   | +   | +   | +   | +   | +   |
| ADH                | -        | +    | -    | +  | -  | +  | +  | -  | +  | -   | +   | +   | +   | +   | -   |
| LDC                | +        | +    | -    | -  | -  | -  | -  | -  | -  | +   | -   | -   | -   | -   | -   |
| ODC                | -        | -    | -    | -  | -  | -  | -  | -  | -  | -   | -   | -   | -   | -   | -   |
| Citrate            | -        | -    | -    | -  | -  | -  | -  | -  | -  | -   | -   | -   | -   | -   | -   |
| H2S                | -        | +    | -    | -  | +  | -  | +  | +  | +  | +   | +   | +   | +   | +   | +   |
| Urease             | -        | -    | -    | -  | -  | -  | -  | -  | -  | -   | -   | -   | -   | -   | -   |
| TDA                | +        | +    | -    | +  | -  | -  | -  | +  | -  | W   | -   | -   | -   | -   | +   |
| Indole             | +        | -    | -    | -  | -  | -  | -  | -  | -  | -   | -   | -   | -   | -   | -   |
| MR                 | -        | -    | -    | -  | -  | -  | -  | -  | -  | -   | -   | -   | -   | -   | -   |
| VP                 | -        | -    | -    | -  | -  | -  | -  | -  | -  | -   | -   | -   | -   | -   | -   |
| Gelatin            | -        | +    | +    | +  | +  | -  | +  | +  | +  | +   | +   | +   | +   | +   | +   |
| Nitrate            | -        | +    | W    | W  | -  | W  | +  | -  | +  | +   | +   | +   | +   | +   | -   |
| Lechithinase       | +        | +    | -    | +  | +  | +  | +  | +  | +  | +   | -   | +   | -   | -   | +   |
| Protease           | +        | +    | -    | +  | -  | +  | -  | -  | +  | +   | -   | +   | -   | -   | -   |
| Growth at 4 °C     | -        | +    | -    | +  | -  | +  | +  | +  | +  | +   | -   | +   | -   | -   | -   |
| Growth at 42°C     | -        | -    | -    | -  | -  | -  | -  | -  | -  | -   | -   | -   | -   | -   | -   |
| Growth at 50 °C    | +        | +    | +    | +  | +  | +  | +  | +  | +  | +   | +   | +   | +   | +   | +   |
| Growth at 5% NaCl  | -        | +    | -    | -  | -  | -  | -  | -  | -  | -   | -   | -   | -   | -   | -   |
| Growth at 7% NaCl  | +        | +    | +    | +  | -  | +  | +  | +  | +  | +   | +   | +   | +   | +   | +   |
| Growth at 10% NaCl | +        | -    | +    | +  | -  | +  | -  | -  | -  | -   | -   | -   | -   | -   | -   |
| <b>API 50CHB</b>   |          |      |      |    |    |    |    |    |    |     |     |     |     |     |     |

|                                     |   |   |   |   |   |   |   |   |   |   |   |   |   |   |   |
|-------------------------------------|---|---|---|---|---|---|---|---|---|---|---|---|---|---|---|
| Glycerol                            | + | + | + | + | - | + | + | - | + | + | + | + | + | + | - |
| Erythritol                          | - | - | - | - | - | + | - | - | - | - | - | - | - | W | - |
| D-Arabinose                         | - | - | - | - | - | - | - | - | - | - | - | - | - | - | - |
| L-Arabinose                         | - | - | - | - | + | - | + | - | + | - | + | + | + | + | - |
| Ribose                              | - | + | - | - | - | - | + | - | + | + | + | + | + | + | - |
| D-Xylose                            | - | - | - | - | + | + | + | - | W | - | + | + | + | - | - |
| L-Xylose                            | - | - | - | - | - | - | - | - | - | - | - | - | - | - | - |
| Adonitol                            | - | - | - | - | - | - | - | - | - | - | - | - | - | - | - |
| B-Methyl-D-xyloside                 | - | - | - | - | - | - | - | - | + | - | - | - | - | - | - |
| Galactose                           | W | + | + | + | - | + | + | - | + | + | + | + | + | + | - |
| D-Glucose                           | + | + | + | + | + | + | + | - | + | + | + | + | + | + | - |
| D-Fructose                          | + | + | + | + | - | + | + | - | + | + | + | + | + | + | - |
| D-Mannose                           | - | + | - | - | - | + | W | - | - | - | + | + | + | + | - |
| L-Sorbose                           | - | - | - | - | - | + | - | - | - | - | + | + | + | - | - |
| Rhamnose                            | - | - | - | - | - | W | W | - | - | - | W | W | - | - | - |
| Dulcitol                            | - | - | - | - | - | + | - | - | - | - | - | - | - | - | - |
| Inositol                            | - | - | - | - | - | - | + | - | W | + | + | + | + | + | - |
| Mannitol                            | + | - | W | + | + | + | + | - | + | - | + | + | + | + | - |
| Sorbitol                            | - | - | - | - | - | + | + | - | + | - | - | W | W | - | - |
| Methyl- $\alpha$ -D-mannopyranoside | - | - | - | - | - | - | W | - | - | - | + | + | + | W | - |
| Methyl- $\alpha$ -D-glucopyranoside | - | W | - | - | - | - | + | - | + | W | + | + | + | W | - |
| N-Acetylglucosamine                 | W | + | W | - | - | - | + | + | W | + | + | + | + | + | + |
| Amygdalin                           | - | + | - | - | - | - | + | - | W | W | + | + | + | + | - |
| Arbutin                             | - | + | - | - | - | - | + | - | + | + | + | + | + | + | - |
| Esculin                             | - | + | - | - | - | - | + | W | + | + | + | + | + | + | W |
| Salicin                             | - | + | - | - | - | - | + | - | + | + | + | + | + | + | - |
| Cellobiose                          | - | + | - | - | - | + | + | - | + | + | + | + | + | + | - |

|                 |            |            |            |            |            |            |            |            |            |            |            |            |            |            |            |   |
|-----------------|------------|------------|------------|------------|------------|------------|------------|------------|------------|------------|------------|------------|------------|------------|------------|---|
| Maltose         | +          | +          | +          | +          | +          | +          | +          | +          | W          | +          | +          | +          | +          | +          | +          | W |
| Lactose         | -          | W          | -          | +          | -          | +          | +          | -          | W          | W          | +          | +          | +          | -          | -          |   |
| Melibiose       | -          | -          | -          | -          | -          | -          | +          | -          | W          | -          | W          | W          | W          | -          | -          |   |
| Saccharose      | +          | +          | +          | +          | -          | +          | +          | -          | +          | +          | +          | +          | +          | +          | -          |   |
| Trehalose       | W          | +          | W          | +          | -          | +          | +          | W          | +          | +          | +          | +          | +          | +          | W          |   |
| Inulin          | -          | -          | -          | -          | -          | -          | +          | -          | +          | -          | -          | -          | -          | -          | -          |   |
| Melezitose      | W          | -          | +          | -          | -          | -          | +          | -          | -          | -          | -          | -          | -          | -          | -          |   |
| D-Raffinose     | -          | -          | -          | -          | -          | -          | +          | -          | W          | -          | +          | +          | +          | W          | -          |   |
| Amidon          | -          | +          | -          | -          | -          | -          | +          | +          | W          | +          | -          | -          | -          | -          | +          |   |
| Glycogen        | -          | +          | -          | -          | +          | -          | +          | -          | +          | +          | -          | -          | -          | -          | -          |   |
| Xylitol         | -          | -          | -          | -          | -          | -          | W          | -          | -          | -          | -          | -          | -          | -          | -          |   |
| β-Gentiobiose   | -          | W          | -          | -          | -          | -          | +          | -          | +          | +          | +          | +          | +          | +          | -          |   |
| D-Turanose      | -          | W          | -          | +          | -          | -          | +          | -          | W          | W          | +          | +          | +          | +          | -          |   |
| D-Lyxose        | -          | -          | -          | -          | -          | -          | -          | -          | -          | -          | -          | -          | -          | -          | -          |   |
| D-Tagatose      | -          | -          | -          | -          | -          | +          | -          | -          | -          | -          | +          | +          | +          | +          | -          |   |
| D-Fucose        | -          | -          | -          | -          | -          | +          | -          | -          | -          | -          | -          | -          | -          | -          | -          |   |
| L-Fucose        | -          | -          | -          | -          | -          | -          | -          | -          | -          | -          | -          | -          | -          | -          | -          |   |
| D-Arabitol      | -          | -          | -          | -          | -          | -          | +          | -          | -          | -          | -          | -          | -          | -          | -          |   |
| L-Arabitol      | -          | -          | -          | -          | -          | -          | -          | -          | -          | -          | -          | -          | -          | -          | -          |   |
| Gluconate       | -          | W          | -          | -          | -          | -          | -          | -          | -          | +          | -          | -          | -          | -          | -          |   |
| 2-Ketogluconate | -          | -          | -          | -          | -          | -          | -          | -          | -          | -          | -          | -          | -          | -          | -          |   |
| 5-Ketogluconate | -          | -          | -          | -          | -          | -          | +          | -          | -          | -          | -          | -          | -          | -          | -          |   |
| <b>API 20E</b>  |            |            |            |            |            |            |            |            |            |            |            |            |            |            |            |   |
| <b>Tests</b>    | <b>G16</b> | <b>G17</b> | <b>G18</b> | <b>G19</b> | <b>G20</b> | <b>G21</b> | <b>G22</b> | <b>G23</b> | <b>G24</b> | <b>G25</b> | <b>G26</b> | <b>G27</b> | <b>G28</b> | <b>G29</b> | <b>G30</b> |   |
| Catalase        | +          | +          | +          | +          | +          | +          | +          | +          | +          | +          | +          | +          | +          | +          | +          |   |
| ONPG            | +          | +          | +          | +          | +          | -          | -          | +          | -          | -          | -          | +          | -          | +          | +          |   |
| ADH             | -          | -          | -          | -          | +          | +          | +          | -          | +          | +          | +          | -          | +          | +          | -          |   |
| LDC             | -          | -          | -          | -          | -          | -          | -          | -          | -          | -          | -          | -          | -          | -          | -          |   |

|                     |                   |   |          |          |   |          |          |          |          |          |          |          |          |          |          |
|---------------------|-------------------|---|----------|----------|---|----------|----------|----------|----------|----------|----------|----------|----------|----------|----------|
| ODC                 | -                 | - | -        | -        | - | -        | -        | -        | -        | -        | -        | -        | -        | -        | -        |
| Citrate             | -                 | + | +        | +        | - | +        | +        | -        | +        | +        | +        | +        | +        | +        | -        |
| H2S                 | -                 | - | -        | -        | - | -        | -        | -        | -        | -        | -        | -        | -        | -        | -        |
| Urease              | +                 | - | -        | -        | - | -        | <b>W</b> | +        | -        | -        | -        | -        | <b>W</b> | +        | +        |
| TDA                 | -                 | - | -        | -        | - | -        | -        | -        | -        | -        | -        | -        | -        | -        | -        |
| Indole              | -                 | - | -        | -        | - | -        | -        | -        | -        | -        | -        | -        | -        | -        | -        |
| MR                  | -                 | - | -        | -        | - | -        | -        | -        | -        | -        | -        | -        | -        | -        | -        |
| VP                  | +                 | + | +        | +        | + | +        | +        | +        | +        | +        | +        | +        | +        | +        | +        |
| Gelatin             | <b>W</b>          | + | +        | +        | - | +        | +        | <b>W</b> | +        | +        | +        | +        | +        | +        | <b>W</b> |
| Nitrate             | +                 | + | +        | +        | - | +        | +        | +        | +        | +        | +        | +        | +        | +        | +        |
| Lechithinase        | +                 | + | -        | +        | - | +        | +        | +        | +        | +        | +        | +        | +        | +        | +        |
| Protease            | +                 | + | +        | +        | - | +        | +        | +        | +        | -        | <b>W</b> | +        | +        | +        | +        |
| Growth at 4 °C      | -                 | - | -        | -        | - | -        | -        | -        | -        | -        | -        | -        | -        | -        | -        |
| Growth at 42°C      | +                 | + | +        | +        | - | <b>W</b> | +        | +        | <b>W</b> | <b>W</b> | <b>W</b> | <b>W</b> | <b>W</b> | <b>W</b> | +        |
| Growth at 50 °C     | -                 | - | -        | -        | - | -        | -        | -        | -        | -        | -        | -        | -        | -        | -        |
| Growth at 5% NaCl   | +                 | + | +        | +        | + | +        | +        | +        | +        | +        | +        | +        | +        | +        | +        |
| Growth at 7% NaCl   | +                 | - | <b>W</b> | -        | - | -        | -        | +        | -        | -        | -        | -        | -        | -        | +        |
| Growth at 10% NaCl  | +                 | - | -        | -        | - | -        | -        | +        | -        | -        | -        | -        | -        | -        | +        |
| <b>Tests</b>        | <b>API 50 CHB</b> |   |          |          |   |          |          |          |          |          |          |          |          |          |          |
| Glycerol            | +                 | + | +        | +        | - | +        | +        | +        | +        | +        | +        | +        | +        | +        | +        |
| Erythritol          | -                 | - | -        | -        | - | -        | -        | -        | -        | -        | -        | -        | -        | -        | -        |
| D-Arabinose         | -                 | - | -        | -        | - | -        | -        | -        | -        | -        | -        | -        | -        | -        | -        |
| L-Arabinose         | -                 | + | +        | +        | - | -        | -        | -        | -        | -        | -        | +        | -        | -        | -        |
| Ribose              | -                 | + | +        | +        | + | +        | +        | -        | +        | +        | +        | +        | +        | +        | -        |
| D-Xylose            | -                 | + | +        | <b>W</b> | - | -        | -        | -        | -        | -        | -        | +        | -        | -        | -        |
| L-Xylose            | -                 | - | -        | -        | - | -        | -        | -        | -        | -        | -        | -        | -        | -        | -        |
| Adonitol            | -                 | - | -        | -        | - | -        | -        | -        | -        | -        | -        | -        | -        | -        | -        |
| B-Methyl-D-xyloside | -                 | - | -        | +        | - | -        | -        | -        | -        | -        | -        | -        | -        | -        | -        |

|                                     |   |   |   |   |   |   |   |   |   |   |   |   |   |   |   |
|-------------------------------------|---|---|---|---|---|---|---|---|---|---|---|---|---|---|---|
| Galactose                           | + | + | + | + | - | - | + | + | - | - | - | + | + | + | + |
| D-Glucose                           | + | + | + | + | - | + | + | + | + | + | + | + | + | + | + |
| D-Fructose                          | + | + | + | + | + | + | + | + | + | + | + | + | + | + | + |
| D-Mannose                           | - | + | - | - | - | + | - | - | + | + | + | + | - | + | - |
| L-Sorbose                           | - | + | - | - | - | - | - | - | - | - | - | + | - | - | - |
| Rhamnose                            | - | - | W | - | - | - | - | - | - | - | - | - | - | - | - |
| Dulcitol                            | - | - | - | - | - | - | - | - | - | - | - | - | - | - | - |
| Inositol                            | - | + | + | W | - | - | + | - | - | - | - | + | + | - | - |
| Mannitol                            | + | + | + | + | - | - | - | + | - | - | - | + | - | - | + |
| Sorbitol                            | - | W | + | + | - | - | - | - | - | - | - | W | - | - | - |
| Methyl- $\alpha$ -D-mannopyranoside | - | + | - | - | - | - | - | - | - | - | - | + | - | - | - |
| Methyl- $\alpha$ -D-glucopyranoside | - | + | + | + | - | W | W | - | W | W | - | + | W | - | - |
| N-Acetylglucosamine                 | - | + | + | W | - | + | + | - | + | + | + | + | + | + | - |
| Amygdalin                           | - | + | W | W | - | W | W | - | W | W | W | + | W | + | - |
| Arbutin                             | - | + | + | + | - | + | + | - | + | + | + | + | + | + | - |
| Esculin                             | - | + | + | + | - | + | + | - | + | + | + | + | + | + | - |
| Salicin                             | - | + | + | + | - | + | + | - | + | + | + | + | + | + | - |
| Cellobiose                          | - | + | + | + | - | + | + | - | + | + | + | + | + | + | - |
| Maltose                             | + | + | W | + | - | + | + | + | + | + | + | + | + | + | + |
| Lactose                             | + | + | + | W | - | - | W | + | - | - | - | + | W | W | + |
| Melibiose                           | - | W | + | W | - | - | - | - | - | - | - | W | - | - | - |
| Saccharose                          | + | + | + | + | - | + | + | + | + | + | + | + | + | + | + |
| Trehalose                           | + | + | + | + | - | + | + | + | + | + | + | + | + | + | + |
| Inulin                              | - | - | + | + | - | - | - | - | - | - | - | - | - | - | - |
| Melezitose                          | - | - | + | - | - | + | - | - | + | + | + | - | - | - | - |
| D-Raffinose                         | - | + | + | W | - | - | - | - | - | - | - | + | - | - | - |
| Amidon                              | - | - | + | W | - | + | + | - | + | + | + | - | + | + | - |

|                  |                |            |            |            |            |            |            |            |            |            |            |            |            |            |            |
|------------------|----------------|------------|------------|------------|------------|------------|------------|------------|------------|------------|------------|------------|------------|------------|------------|
| Glycogen         | -              | -          | +          | +          | -          | +          | +          | -          | +          | +          | +          | -          | +          | +          | -          |
| Xylitol          | -              | -          | -          | -          | -          | -          | -          | -          | -          | -          | -          | -          | -          | -          | -          |
| β-Gentiobiose    | -              | +          | +          | +          | -          | -          | +          | -          | W          | W          | W          | +          | +          | W          | -          |
| D-Turanose       | +              | +          | +          | W          | -          | W          | W          | +          | W          | W          | W          | +          | W          | -          | +          |
| D-Lyxose         | -              | -          | -          | -          | -          | -          | -          | -          | -          | -          | -          | -          | -          | -          | -          |
| D-Tagatose       | -              | +          | -          | -          | -          | -          | -          | -          | -          | -          | -          | +          | -          | -          | -          |
| D-Fucose         | -              | -          | -          | -          | -          | -          | -          | -          | -          | -          | -          | -          | -          | -          | -          |
| L-Fucose         | -              | -          | -          | -          | -          | W          | -          | -          | W          | W          | W          | -          | -          | -          | -          |
| D-Arabitol       | -              | -          | -          | -          | -          | -          | -          | -          | -          | -          | -          | -          | -          | -          | -          |
| L-Arabitol       | -              | -          | -          | -          | -          | -          | -          | -          | -          | -          | -          | -          | -          | -          | -          |
| Gluconate        | -              | -          | -          | -          | -          | W          | +          | -          | W          | W          | W          | -          | +          | W          | -          |
| 2-Ketogluconate  | -              | -          | -          | -          | -          | -          | -          | -          | -          | -          | -          | -          | -          | -          | -          |
| 5-Ketogluconate  | -              | -          | -          | -          | -          | -          | -          | -          | -          | -          | -          | -          | -          | -          | -          |
| <b>Tests</b>     | <b>API 20E</b> |            |            |            |            |            |            |            |            |            |            |            |            |            |            |
|                  | <b>G31</b>     | <b>G32</b> | <b>G33</b> | <b>G34</b> | <b>G35</b> | <b>G36</b> | <b>G37</b> | <b>G38</b> | <b>G39</b> | <b>G40</b> | <b>G41</b> | <b>G42</b> | <b>G43</b> | <b>G44</b> | <b>G45</b> |
| Catalase         | +              | +          | +          | +          | +          | +          | +          | +          | +          | +          | +          | +          | +          | +          | +          |
| ONPG             | +              | -          | +          | +          | -          | +          | -          | +          | -          | -          | -          | +          | -          | +          | +          |
| ADH              | -              | +          | -          | +          | -          | -          | +          | -          | -          | -          | -          | +          | -          | -          | -          |
| LDC              | -              | -          | -          | -          | -          | +          | -          | -          | -          | -          | -          | -          | -          | -          | -          |
| ODC              | -              | -          | -          | -          | -          | -          | -          | -          | -          | -          | -          | +          | -          | -          | -          |
| Citrate          | +              | +          | +          | +          | +          | +          | +          | +          | +          | +          | +          | +          | +          | +          | +          |
| H <sub>2</sub> S | -              | -          | -          | -          | -          | -          | -          | -          | -          | -          | -          | -          | -          | -          | -          |
| Urease           | -              | W          | -          | +          | +          | -          | W          | -          | +          | -          | +          | -          | -          | -          | -          |
| TDA              | -              | -          | -          | -          | -          | -          | -          | -          | -          | -          | -          | -          | -          | -          | -          |
| Indole           | -              | -          | -          | -          | -          | -          | -          | -          | -          | -          | -          | -          | -          | -          | -          |
| MR               | -              | -          | -          | -          | -          | -          | -          | -          | -          | -          | -          | -          | -          | -          | -          |

|                     |                  |   |          |   |   |   |   |          |          |   |   |   |          |          |          |
|---------------------|------------------|---|----------|---|---|---|---|----------|----------|---|---|---|----------|----------|----------|
| VP                  | +                | + | +        | + | + | + | + | +        | +        | + | + | + | +        | +        | +        |
| Gelatin             | +                | + | +        | + | - | - | + | +        | -        | - | - | - | +        | +        | +        |
| Nitrate             | +                | + | +        | + | + | + | + | -        | +        | + | + | + | +        | -        | +        |
| Lechithinase        | -                | + | +        | + | - | - | + | -        | -        | - | - | - | +        | -        | +        |
| Protease            | -                | - | +        | - | - | - | + | -        | -        | - | - | - | +        | -        | -        |
| Growth at 4 °C      | -                | - | -        | - | - | - | - | -        | -        | - | - | - | -        | -        | -        |
| Growth at 42°C      | -                | + | <b>W</b> | + | + | - | + | <b>W</b> | <b>W</b> | - | + | - | <b>W</b> | -        | <b>W</b> |
| Growth at 50 °C     | -                | - | -        | - | - | - | - | -        | -        | - | - | - | -        | -        | -        |
| Growth at 5% NaCl   | +                | + | +        | + | + | + | + | +        | +        | + | + | + | +        | +        | +        |
| Growth at 7% NaCl   | -                | - | -        | - | - | - | - | -        | -        | - | - | - | -        | -        | -        |
| Growth at 10% NaCl  | -                | - | -        | - | - | - | - | -        | -        | - | - | - | -        | -        | -        |
| <b>Tests</b>        | <b>API 50CHB</b> |   |          |   |   |   |   |          |          |   |   |   |          |          |          |
| Glycerol            | +                | + | +        | + | - | - | + | +        | -        | - | - | - | +        | +        | +        |
| Erythritol          | -                | - | -        | - | - | - | - | <b>W</b> | -        | - | - | - | -        | <b>W</b> | -        |
| D-Arabinose         | +                | - | -        | - | - | - | - | -        | -        | - | - | - | -        | -        | -        |
| L-Arabinose         | +                | - | +        | + | - | + | - | +        | -        | + | - | + | +        | +        | +        |
| Ribose              | +                | + | +        | + | + | - | + | +        | -        | - | - | - | +        | +        | +        |
| D-Xylose            | +                | - | <b>W</b> | + | - | + | - | -        | -        | + | - | + | +        | -        | <b>W</b> |
| L-Xylose            | -                | - | -        | - | - | - | - | -        | -        | - | - | - | -        | -        | -        |
| Adonitol            | -                | - | -        | - | - | + | - | -        | -        | - | - | - | -        | -        | -        |
| B-Methyl-D-xyloside | +                | - | +        | - | - | - | - | -        | -        | - | - | - | -        | -        | +        |
| Galactose           | +                | + | +        | + | - | - | + | +        | -        | - | - | - | +        | +        | +        |
| D-Glucose           | +                | + | +        | + | - | + | + | +        | -        | + | - | + | +        | +        | +        |
| D-Fructose          | +                | + | +        | + | - | - | + | +        | -        | - | - | - | +        | +        | +        |
| D-Mannose           | +                | - | -        | + | - | + | - | +        | -        | - | - | - | +        | +        | -        |
| L-Sorbose           | -                | - | -        | - | - | - | - | -        | -        | - | - | - | <b>W</b> | -        | -        |
| Rhamnose            | +                | - | -        | - | - | + | - | -        | -        | - | - | + | <b>W</b> | -        | -        |



|                                     |   |   |   |   |   |   |   |   |   |   |   |   |   |   |   |
|-------------------------------------|---|---|---|---|---|---|---|---|---|---|---|---|---|---|---|
| Dulcitol                            | - | - | - | - | - | + | - | - | - | - | - | - | - | - | - |
| Inositol                            | + | + | W | + | - | + | + | + | - | - | - | + | + | + | W |
| Mannitol                            | + | - | + | + | - | + | - | + | - | + | - | + | + | + | + |
| Sorbitol                            | - | - | + | + | - | + | - | - | - | - | - | + | + | - | + |
| Methyl- $\alpha$ -D-mannopyranoside | - | - | - | M | - | - | - | W | - | - | - | - | - | W | - |
| Methyl- $\alpha$ -D-glucopyranoside | + | W | + | + | + | + | W | W | - | - | - | - | + | W | + |
| N-Acetylglucosamine                 | + | + | W | W | + | - | + | + | + | - | + | - | W | + | W |
| Amygdalin                           | + | W | + | + | - | - | W | + | - | - | - | - | + | + | W |
| Arbutin                             | + | + | + | + | - | - | + | + | - | - | - | - | + | + | + |
| Esculin                             | + | + | + | + | - | - | + | + | W | - | W | - | + | + | + |
| Salicin                             | + | + | + | + | - | + | + | + | - | - | - | + | + | + | + |
| Cellobiose                          | + | + | + | + | - | + | + | + | - | - | - | + | + | + | + |
| Maltose                             | + | + | + | + | - | + | + | + | W | + | W | + | + | + | + |
| Lactose                             | + | W | W | + | - | + | W | - | - | - | - | - | + | - | W |
| Melibiose                           | + | - | W | + | + | - | - | - | - | - | - | - | + | - | W |
| Saccharose                          | + | + | + | + | + | + | + | + | - | - | - | + | + | + | + |
| Trehalose                           | + | + | + | + | - | + | + | + | W | - | W | + | + | + | + |
| Inulin                              | + | - | + | W | - | - | - | - | - | - | - | - | + | - | + |
| Melezitose                          | W | - | - | - | - | + | - | - | - | - | - | + | - | - | - |
| D-Raffinose                         | + | - | W | + | - | + | - | W | - | - | - | - | + | W | - |
| Amidon                              | + | + | W | + | - | - | + | - | + | - | + | - | + | - | W |
| Glycogen                            | + | + | + | + | - | - | + | - | - | + | - | - | + | - | + |
| Xylitol                             | - | - | - | - | - | + | - | - | - | - | - | - | - | - | - |
| $\beta$ -Gentiobiose                | + | + | + | + | - | - | + | + | - | - | - | - | + | + | + |
| D-Turanose                          | + | W | W | + | - | - | W | + | - | - | - | - | + | + | W |
| D-Lyxose                            | - | - | - | - | - | - | - | - | - | - | - | W | - | - | - |
| D-Tagatose                          | - | - | - | - | - | - | - | + | - | - | - | - | - | + | - |

|                 |                |            |            |            |            |            |            |            |            |            |            |            |            |            |            |
|-----------------|----------------|------------|------------|------------|------------|------------|------------|------------|------------|------------|------------|------------|------------|------------|------------|
| D-Fucose        | -              | -          | -          | -          | -          | -          | -          | -          | -          | -          | -          | -          | -          | -          | -          |
| L-Fucose        | -              | -          | -          | -          | -          | +          | -          | -          | -          | -          | -          | -          | -          | -          | -          |
| D-Arabitol      | -              | -          | -          | -          | -          | -          | -          | -          | -          | -          | -          | -          | -          | -          | -          |
| L-Arabitol      | -              | -          | -          | -          | -          | +          | -          | -          | -          | -          | -          | -          | -          | -          | -          |
| Gluconate       | +              | +          | -          | -          | -          | -          | +          | -          | -          | -          | -          | -          | W          | -          | -          |
| 2-Ketogluconate | -              | -          | -          | -          | -          | -          | -          | -          | -          | -          | -          | -          | -          | -          | -          |
| 5-Ketogluconate | +              | -          | -          | -          | -          | +          | -          | -          | -          | -          | -          | -          | W          | -          | -          |
| <b>Tests</b>    | <b>API 20E</b> |            |            |            |            |            |            |            |            |            |            |            |            |            |            |
|                 | <b>G46</b>     | <b>G47</b> | <b>G48</b> | <b>G49</b> | <b>G50</b> | <b>G51</b> | <b>G52</b> | <b>G53</b> | <b>G54</b> | <b>G55</b> | <b>G56</b> | <b>G57</b> | <b>G58</b> | <b>G59</b> | <b>G60</b> |
| Catalase        | +              | +          | +          | +          | +          | +          | +          | +          | +          | +          | +          | +          | +          | +          | +          |
| ONPG            | +              | +          | -          | +          | -          | -          | +          | +          | +          | +          | -          | +          | +          | -          | +          |
| ADH             | -              | -          | -          | -          | -          | -          | +          | -          | -          | -          | -          | -          | -          | +          | -          |
| LDC             | -              | +          | -          | -          | -          | -          | -          | -          | -          | +          | -          | -          | -          | -          | -          |
| ODC             | -              | -          | -          | -          | -          | -          | -          | -          | -          | -          | -          | -          | -          | -          | -          |
| Citrate         | -              | +          | +          | +          | +          | +          | -          | -          | +          | -          | +          | +          | +          | -          | +          |
| H2S             | -              | -          | -          | -          | -          | -          | -          | -          | -          | -          | -          | +          | +          | -          | -          |
| Urease          | +              | -          | +          | -          | +          | -          | -          | -          | -          | -          | +          | -          | -          | +          | -          |
| TDA             | -              | -          | -          | -          | -          | -          | -          | -          | -          | -          | -          | -          | -          | +          | -          |
| Indole          | -              | -          | -          | -          | -          | -          | -          | -          | -          | +          | -          | +          | +          | -          | -          |
| MR              | -              | -          | -          | -          | -          | -          | -          | -          | -          | +          | -          | -          | -          | -          | -          |
| VP              | +              | +          | +          | +          | +          | +          | +          | -          | +          | -          | +          | +          | +          | -          | +          |
| Gelatin         | <b>W</b>       | -          | -          | +          | -          | -          | -          | <b>W</b>   | +          | -          | -          | <b>W</b>   | <b>W</b>   | -          | +          |
| Nitrate         | +              | +          | +          | +          | +          | +          | -          | +          | -          | +          | +          | +          | +          | +          | -          |
| Lechithinase    | +              | -          | -          | +          | -          | -          | -          | +          | -          | -          | -          | +          | -          | +          | -          |
| Protease        | +              | -          | +          | +          | -          | -          | -          | +          | -          | -          | -          | +          | -          | -          | -          |
| Growth at 4 °C  | -              | -          | -          | -          | -          | -          | -          | -          | -          | -          | -          | -          | -          | -          | -          |
| Growth at 42°C  | +              | -          | <b>W</b>   | +          | +          | -          | -          | +          | -          | <b>W</b>   | +          | -          | +          | +          | -          |

|                                     |                  |   |   |   |   |   |   |   |   |   |   |   |   |   |   |
|-------------------------------------|------------------|---|---|---|---|---|---|---|---|---|---|---|---|---|---|
| Growth at 50 °C                     | -                | - | - | - | - | - | - | - | - | - | - | - | - | - | - |
| Growth at 5% NaCl                   | +                | + | + | + | + | + | - | + | + | W | + | - | - | + | + |
| Growth at 7% NaCl                   | +                | - | - | - | - | - | - | + | - | - | - | - | - | + | - |
| Growth at 10% NaCl                  | +                | - | - | - | - | - | - | + | - | - | - | - | - | + | - |
| <b>Tests</b>                        | <b>API 50CHB</b> |   |   |   |   |   |   |   |   |   |   |   |   |   |   |
| Glycerol                            | +                | + | - | + | - | - | - | + | + | - | - | + | + | + | + |
| Erythritol                          | -                | - | - | - | - | - | - | + | - | - | - | - | - | - | W |
| D-Arabinose                         | -                | - | - | - | - | - | - | - | - | + | - | - | - | - | - |
| L-Arabinose                         | -                | + | - | + | - | + | - | - | + | + | - | + | W | - | + |
| Ribose                              | -                | + | - | + | - | - | + | - | + | + | - | + | - | - | + |
| D-Xylose                            | -                | + | - | + | - | + | - | + | - | - | - | W | - | - | - |
| L-Xylose                            | -                | - | - | - | - | - | - | - | - | - | - | - | - | - | - |
| Adonitol                            | -                | + | - | - | - | - | - | - | - | - | - | - | - | - | - |
| B-Methyl-D-xyloside                 | -                | - | - | + | - | - | - | - | - | - | - | + | - | - | - |
| Galactose                           | +                | + | - | + | - | - | - | + | + | + | - | + | - | W | + |
| D-Glucose                           | +                | + | - | + | - | + | - | + | + | + | - | + | + | + | + |
| D-Fructose                          | +                | + | - | + | - | - | + | + | + | + | - | + | - | + | + |
| D-Mannose                           | -                | + | - | - | - | - | - | + | + | + | - | - | + | - | + |
| L-Sorbose                           | -                | - | - | - | - | - | - | + | - | - | - | - | - | - | - |
| Rhamnose                            | -                | + | - | - | - | - | - | + | - | + | - | - | W | - | - |
| Dulcitol                            | -                | - | - | - | - | - | - | + | - | - | - | - | - | - | - |
| Inositol                            | -                | + | - | W | - | - | - | - | + | - | - | W | - | - | + |
| Mannitol                            | +                | + | - | + | - | + | - | + | + | + | - | + | + | + | + |
| Sorbitol                            | -                | + | - | + | - | - | - | + | - | - | - | + | - | - | - |
| Methyl- $\alpha$ -D-mannopyranoside | -                | - | - | - | - | - | - | - | + | - | - | - | - | - | W |
| Methyl- $\alpha$ -D-glucopyranoside | -                | + | - | + | - | - | - | - | + | - | - | + | + | - | w |
| N-Acetylglucosamine                 | -                | + | + | W | + | - | - | - | + | - | + | W | - | + | + |

|                      |                |   |   |   |   |   |   |   |   |   |   |   |   |   |   |
|----------------------|----------------|---|---|---|---|---|---|---|---|---|---|---|---|---|---|
| Amygdalin            | -              | - | - | W | - | - | - | - | + | - | - | W | - | - | + |
| Arbutin              | -              | + | - | + | - | - | - | - | + | - | - | + | - | - | + |
| Esculin              | -              | + | W | + | W | - | - | - | + | W | W | + | - | - | + |
| Salicin              | -              | + | - | + | - | - | - | - | + | - | - | + | - | - | + |
| Cellobiose           | -              | + | - | + | - | - | - | + | + | - | - | + | + | - | + |
| Maltose              | +              | + | W | + | W | + | - | + | + | + | W | + | + | + | + |
| Lactose              | +              | + | - | W | - | - | - | + | - | + | - | W | W | - | - |
| Melibiose            | -              | + | - | W | - | - | - | - | - | - | - | W | - | - | - |
| Saccharose           | +              | + | - | + | - | - | - | + | + | + | - | + | + | + | + |
| Trehalose            | +              | + | W | + | W | - | - | + | + | + | W | + | + | W | + |
| Inulin               | -              | - | - | + | - | - | - | - | - | - | - | + | - | - | - |
| Melezitose           | -              | - | - | - | - | - | - | - | - | - | - | - | - | W | - |
| D-Raffinose          | -              | + | - | - | - | - | - | - | + | - | - | - | - | - | W |
| Amidon               | -              | - | + | W | + | - | - | - | W | - | + | W | - | - | - |
| Glycogen             | -              | - | - | + | - | + | - | - | - | - | - | + | - | - | - |
| Xylitol              | -              | - | - | - | - | - | - | - | - | - | - | - | - | - | - |
| $\beta$ -Gentiobiose | -              | + | - | + | - | - | - | - | + | - | - | + | - | - | + |
| D-Turanose           | +              | - | - | W | - | - | - | - | + | - | - | W | - | - | + |
| D-Lyxose             | -              | - | - | - | - | - | - | - | - | - | - | - | - | - | - |
| D-Tagatose           | -              | - | - | - | - | - | - | + | + | - | - | - | - | - | + |
| D-Fucose             | -              | - | - | - | - | - | - | + | - | - | - | - | - | - | - |
| L-Fucose             | -              | + | - | - | - | - | - | - | - | - | - | - | - | - | - |
| D-Arabitol           | -              | + | - | - | - | - | - | - | - | + | - | - | - | - | - |
| L-Arabitol           | -              | - | - | - | - | - | - | - | - | - | - | - | - | - | - |
| Gluconate            | -              | + | - | - | - | - | - | - | - | - | - | - | - | - | - |
| 2-Ketogluconate      | -              | + | - | - | - | - | - | - | - | - | - | - | - | - | - |
| 5-Ketogluconate      | -              | - | - | - | - | - | - | - | - | - | - | - | - | - | - |
| <b>Tests</b>         | <b>API 20E</b> |   |   |   |   |   |   |   |   |   |   |   |   |   |   |

|                    | G61              | G62 | G63 | G64 | G65 | G66 | G67 | G68 | G69 | G70 |
|--------------------|------------------|-----|-----|-----|-----|-----|-----|-----|-----|-----|
| Catalase           | +                | +   | +   | +   | +   | +   | +   | +   | +   | +   |
| ONPG               | +                | +   | +   | +   | +   | +   | +   | +   | -   | +   |
| ADH                | -                | -   | -   | -   | -   | -   | -   | -   | +   | -   |
| LDC                | -                | -   | -   | -   | -   | -   | -   | -   | -   | -   |
| ODC                | -                | -   | -   | -   | -   | -   | -   | -   | -   | -   |
| Citrate            | +                | +   | +   | +   | +   | +   | +   | +   | -   | +   |
| H <sub>2</sub> S   | -                | -   | -   | -   | -   | -   | -   | -   | -   | -   |
| Urease             | -                | -   | -   | -   | -   | -   | -   | -   | -   | -   |
| TDA                | -                | -   | -   | -   | -   | -   | -   | -   | -   | -   |
| Indole             | -                | -   | -   | -   | -   | -   | -   | -   | -   | -   |
| MR                 | -                | -   | -   | -   | -   | -   | -   | -   | -   | -   |
| VP                 | +                | +   | +   | +   | +   | +   | +   | +   | +   | +   |
| Gelatin            | +                | +   | +   | +   | +   | +   | +   | +   | +   | +   |
| Nitrate            | -                | -   | -   | -   | -   | -   | -   | -   | +   | -   |
| Lecithinase        | -                | -   | -   | -   | -   | -   | -   | -   | -   | -   |
| Protease           | -                | -   | -   | -   | -   | -   | -   | -   | -   | -   |
| Growth at 4 °C     | -                | -   | -   | -   | -   | -   | -   | -   | -   | -   |
| Growth at 42°C     | -                | -   | -   | -   | -   | -   | -   | -   | -   | -   |
| Growth at 50 °C    | -                | -   | -   | -   | -   | -   | -   | -   | -   | -   |
| Growth at 5% NaCl  | +                | +   | +   | +   | +   | +   | +   | +   | -   | -   |
| Growth at 7% NaCl  | -                | -   | -   | -   | -   | -   | -   | -   | -   | -   |
| Growth at 10% NaCl | -                | -   | -   | -   | -   | -   | -   | -   | -   | -   |
| <b>Tests</b>       | <b>API 50CHB</b> |     |     |     |     |     |     |     |     |     |
| Glycerol           | +                | +   | +   | +   | +   | +   | -   | -   | +   | +   |
| Erythritol         | -                | W   | -   | -   | -   | -   | -   | -   | -   | -   |
| D-Arabinose        | -                | -   | -   | -   | -   | -   | -   | -   | -   | -   |
| L-Arabinose        | +                | +   | +   | +   | +   | +   | -   | +   | W   | +   |
| Ribose             | +                | +   | +   | +   | +   | +   | -   | -   | -   | +   |

|                                     |   |   |   |   |   |   |   |   |   |   |
|-------------------------------------|---|---|---|---|---|---|---|---|---|---|
| D-Xylose                            | - | - | - | - | - | - | - | + | - | + |
| L-Xylose                            | - | - | - | - | - | - | - | - | - | - |
| Adonitol                            | - | - | - | - | - | - | - | - | - | - |
| B-Methyl-D-xyloside                 | - | - | - | - | - | - | - | - | - | - |
| Galactose                           | + | + | + | + | + | W | + | - | + | + |
| D-Glucose                           | + | + | + | + | + | + | + | + | + | + |
| D-Fructose                          | + | + | + | + | + | + | - | - | - | + |
| D-Mannose                           | + | + | + | + | + | + | - | - | + | + |
| L-Sorbose                           | - | - | - | - | - | - | - | - | - | + |
| Rhamnose                            | - | - | - | - | - | + | - | - | - | + |
| Dulcitol                            | - | - | - | - | - | - | - | - | - | - |
| Inositol                            | - | + | - | - | - | - | - | - | - | - |
| Mannitol                            | - | + | - | - | - | - | - | + | + | + |
| Sorbitol                            | - | - | - | - | - | - | - | - | - | + |
| Methyl- $\alpha$ -D-mannopyranoside | W | W | W | W | W | W | - | - | - | - |
| Methyl- $\alpha$ -D-glucopyranoside | - | + | - | - | - | - | - | - | + | W |
| N-Acetylglucosamine                 | W | + | W | W | W | W | - | - | - | - |
| Amygdalin                           | + | + | + | + | + | + | - | - | - | + |
| Arbutin                             | + | + | + | + | + | + | - | - | - | + |
| Esculin                             | + | + | + | + | + | + | + | - | - | + |
| Salicin                             | + | + | + | + | + | + | - | - | - | + |
| Cellobiose                          | + | + | + | + | + | + | + | - | - | + |
| Maltose                             | - | + | - | - | - | - | + | + | - | + |
| Lactose                             | - | - | - | - | - | - | - | - | - | W |
| Melibiose                           | - | - | - | - | - | - | - | - | - | - |
| Saccharose                          | + | + | + | + | + | + | - | - | - | + |
| Trehalose                           | + | + | + | + | + | + | - | - | + | + |

|                 |   |   |   |   |   |   |   |   |   |   |
|-----------------|---|---|---|---|---|---|---|---|---|---|
| Inulin          | - | - | - | - | - | - | - | - | - | + |
| Melezitose      | - | - | - | - | - | - | - | - | - | - |
| D-Raffinose     | - | W | - | - | - | - | - | - | - | + |
| Amidon          | - | - | - | - | - | - | - | - | - | - |
| Glycogen        | - | - | - | - | - | - | - | + | - | - |
| Xylitol         | - | - | - | - | - | - | - | - | - | - |
| β-Gentiobiose   | + | + | + | + | + | + | - | - | - | + |
| D-Turanose      | - | + | - | - | - | - | - | - | - | W |
| D-Lyxose        | - | - | - | - | - | - | - | - | - | - |
| D-Tagatose      | + | + | + | + | + | + | - | - | - | + |
| D-Fucose        | - | - | - | - | - | - | - | - | - | - |
| L-Fucose        | - | - | - | - | - | - | - | - | - | - |
| D-Arabitol      | - | - | - | - | - | - | - | - | - | - |
| L-Arabitol      | - | - | - | - | - | - | - | - | - | - |
| Gluconate       | - | - | - | - | - | - | - | - | - | - |
| 2-Ketogluconate | - | - | - | - | - | - | - | - | - | - |
| 5-Ketogluconate | - | - | - | - | - | - | - | - | - | - |

<sup>a</sup> “+” indicates positive for the test

“-” indicates negative for test

“W”- indicates weakly positive

**Table S2:** Representation of the 16S identification and FAME profile (major fatty acids) of the isolates

| Isolate code | 16S identification                  | Identity (%) | Accession No. | <sup>a</sup> Major fatty acids (%) (≥ 1%)                                                                                                                                                                                                                                                                                                          | Identified as                                   | similarity index |
|--------------|-------------------------------------|--------------|---------------|----------------------------------------------------------------------------------------------------------------------------------------------------------------------------------------------------------------------------------------------------------------------------------------------------------------------------------------------------|-------------------------------------------------|------------------|
| G1           | <i>Staphylococcus hominis</i>       | 99           | KX343960      | 14:0 iso (1.55), 15:0 iso (8.57), 15:0 anteiso (45.97), 16:0 (1.32), 17:0 iso (7.38), 17:0 anteiso (13.8), 18:0 (4.26), 18:0 iso (1.57), 19:0 iso (4.13), 19:0 anteiso (5.19), 20:00 (1.17)                                                                                                                                                        | <i>Staphylococcus hominis-hominis</i>           | 0.507            |
| G2           | <i>Bacillus sp.</i>                 | 92           | KX343961      | 13:0 iso (5.67), 13:0 anteiso (2.05), 14:0 iso (4.88), 15:0 iso (17.63), 15:0 anteiso (7.83), 16:1 w7c alcohol (1.24), 16:0 (8.54), 17:1 iso w10c (2.91), 17:1 iso w5c (3.54), 17:1 anteiso A (1.4)                                                                                                                                                | <i>Bacillus cereus</i> -GC subgroup B           | 0.572            |
| G3           | <i>Staphylococcus sp.</i>           | 99           | KX343962      | 14:0 iso (13.4), 15:0 iso (7.74), 15:0 anteiso (55.77), 16:0 (1.82), 16:0 iso (1.64), 17:0 iso (5.28), 17:0 anteiso (13.16), 18:0 (3.02)                                                                                                                                                                                                           | <i>Staphylococcus cohnii-cohnii</i>             | 0.601            |
| G4           | <i>Staphylococcus saprophyticus</i> | 100          | KX343963      | 14:0(1.10), 14:0 iso (1.88), 15:0 iso (21.9), 15:0 anteiso (41.9), 16:0 (3.57), 16:0 iso (1.94), 17:0 iso (6.56), 17:0 anteiso(18.43), 18:0(5.57), 20:0 (9.24)                                                                                                                                                                                     | <i>Staphylococcus saprophyticus</i>             | 0.528            |
| G5           | <i>Alcaligenes faecalis</i>         | 100          | KX343964      | 12:0(3.22), 12:0 2OH (2.24), 14:0(1.09), 14:0 3OH (8.2), 16:0 (36.1), 17:00 (9.48), 17:0 cyclo (1.04), 18:01 (1.1), 19:0 cyclo w8c (8.44), 20:00 (29.35)                                                                                                                                                                                           | <i>Alkaligenes - faecalis</i>                   | 0.516            |
| G6           | <i>Staphylococcus sp.</i>           | 99           | KX343965      | 13:0 iso (1.22), 14:0 (1.76), 14:0 iso (1.1), 15:0(13.85), 15:0 iso (59.14), 16:0(16.19), 16:0 iso (0.28), 17:0 iso (5.94), 17:0 cyclo (2.69)                                                                                                                                                                                                      | <i>Staphylococcus lentus</i>                    | 0.486            |
| G7           | <i>Bacillus sp.</i>                 | 100          | KX343966      | 14:0 iso (1.76), 15:0 iso (36.52), 15:0 anteiso (39.82), 16:1 w7c alcohol (2.32), 16:1 w11c (1.41), 16:0 iso (2.4), 17:1 iso w10c (3.89), 17:0 iso (2.85), 17:0 anteiso (2.88), Sum In Feature 4 (17:1 iso I/anteiso B) (1.97)                                                                                                                     | <i>Bacillus-megaterium</i> -GC subgroup A       | 0.602            |
| G8           | <i>Lysinibacillus sp.</i>           | 95           | KX343967      | 14:0 iso (3.62), 15:0 iso (42.08), 15:0 anteiso (9.72), 16:1 w7c alcohol (13.1), 16:1 w11c (2.98), 16:0 iso (12.45), 17:1 iso w10c (1.2), 17:0 iso (3.28), 17:0 anteiso (2.98), Sum In Feature 4(17:1 iso I/anteiso B) (1.61)                                                                                                                      | <i>Lysinibacillus sphaericus</i> -GC subgroup E | 0.642            |
| G9           | <i>Bacillus subtilis</i>            | 100          | KX343968      | 14:0 iso (1.36), 15:0 iso (39.29), 15:0 anteiso (31.63), 16:1 w7c alcohol (1.36), 16:1 w11c (1.37), 16:0(2.56), 16:0 iso (2.69), 17:1 iso w10c (3.5), 17:0 iso (5.69), 17:0 anteiso (5.3)                                                                                                                                                          | <i>Bacillus subtilis</i>                        | 0.534            |
| G10          | <i>Bacillus cereus</i>              | 99           | KX343969      | 12:0(1.07), 13:0 iso (5.3), 13:0 anteiso (1.78), 14:0(3.11), 14:0 iso (5.86), 15:0 iso (19.58), 15:0 anteiso (6.99), 16:1 w7c alcohol (1.03), 16:0(8.97), 16:0 iso (13.11), 16:1 iso I (2.83), 17:1 iso w10c (1.91), 17:1 iso w5c (2.36), 17:1 anteiso A (1.28), 17:0 iso (9.17), 17:0 anteiso (3.67), Sum In Feature 3 (16:1 w7c/16:1 w6c) (7.02) | <i>Bacillus cereus</i> GC subgroup B            | 0.566            |
| G11          | <i>Bacillus invictae</i>            | 99           | KX343970      | 14:0 iso (1.06), 15:0 iso (43.61), 15:0 anteiso (24.44), 16:0(2.48), 16:0 iso (3.96), 17:1 iso w10c (2.1), 17:0 iso (11.43), 17:0 anteiso (7.24)                                                                                                                                                                                                   | <i>Bacillus pumilus</i>                         | 0.585            |
| 12           | <i>Bacillus sp.</i>                 | 100          | KX343971      | 13:0 iso (6.48), 13:0 anteiso (1.02), 14:0(2.86), 14:0 iso (3.5), 15:0 iso (31.14), 15:0 anteiso (5.38), 16:0(5.21), 16:0 iso (7.42), 17:1 iso w10c (1.75), 17:1 iso w5c (4.92), 17:1 anteiso A (1.44), 17:0 iso (10.98), 17:0 anteiso (2.44), Sum In Feature 3 (16:1 w7c/16:1 w6c) (8.54)                                                         | <i>Bacillus-cereus</i> -GC subgroup B           | 0.628            |



|     |                                     |     |          |                                                                                                                                                                                                                                                                                                                                        |                                          |       |
|-----|-------------------------------------|-----|----------|----------------------------------------------------------------------------------------------------------------------------------------------------------------------------------------------------------------------------------------------------------------------------------------------------------------------------------------|------------------------------------------|-------|
| G13 | <i>Bacillus sp.</i>                 | 100 | KX343972 | 14:0 iso (1.83), 15:0 iso (48.89), 15:0 anteiso (29.66), 16:0(1.47), 16:0 iso (2.63), 17:1 iso w10c (1.49), 17:0 iso (5.24), 17:0 anteiso (5.66), Sum In Feature 4(17:1 iso I/anteiso B) (1.78)                                                                                                                                        | <i>Bacillus pumilus</i>                  | 0.513 |
| G14 | <i>Bacillus pumilus</i>             | 100 | KX343973 | 14:0(1.07), 15:0 iso (43.63), 15:0 anteiso (24.44), 16:0(2.47), 16:0 iso (3.95), 17:1 iso w10c (2.07), 17:0 iso (11.37), 17:0 anteiso (7.19)                                                                                                                                                                                           | <i>Bacillus pumilus</i>                  | 0.611 |
| G15 | <i>Lysinibacillus fusiformis</i>    | 100 | KX343974 | 14:0(3.35), 15:0 iso (41.68), 15:0 anteiso (10.41), 16:1 w7c alcohol (13.34), 16:1 w11c (2.09), 16:0 iso (14.21), 17:1 iso w10c (1.23), 17:0 iso (3.47), 17:0 anteiso (2.68), Sum In Feature 4(17:1 iso I/anteiso B) (1.54)                                                                                                            | <i>Lysinibacillus fusiformis</i>         | 0.696 |
| G16 | <i>Staphylococcus sp.</i>           | 99  | KX343975 | 14:0(1.10), 14:0 iso (1.88), 15:0 iso (21.9), 15:0 anteiso (41.9), 16:0(3.57), 16:0 iso (1.94), 17:0 iso (6.56), 17:0 anteiso (18.19), 18:0(5.57), 20:00 (9.24)                                                                                                                                                                        | <i>Staphylococcus saprophyticus</i>      | 0.621 |
| G17 | <i>Bacillus sp.</i>                 | 99  | KX343976 | 13:0 iso (6.48), 13:0 anteiso (1.02), 14:0(2.86), 14:0 iso (3.5), 15:0 iso (31.14), 15:0 anteiso (5.38), 16:0(5.21), 16:0 iso (7.42), 17:1 iso w10c (1.75), 17:1 iso w5c (4.92), 17:1 anteiso A (1.44), 17:0 iso (10.98), 17:0 anteiso (2.44), Sum In Feature 3 (16:1 w7c/16:1 w6c) (8.54)                                             | <i>Bacillus-cereus-GC subgroup B</i>     | 0.586 |
| G18 | <i>Bacillus megaterium</i>          | 100 | KX343977 | 15:0 iso (38.3), 15:0 anteiso (38.93), 16:1 w7c alcohol (1.56), 16:1 w11c (1.44), 16:0 iso (1.12), 17:1 iso w10c (3.98), 17:1 anteiso (1.76), 17:0 iso (2.63), 17:0 anteiso (2.74)                                                                                                                                                     | <i>Bacillus-megaterium-GC subgroup A</i> | 0.643 |
| G19 | <i>Bacillus subtilis</i>            | 99  | KX343978 | 14:0 iso (1.25), 15:0 iso (15.44), 15:0 anteiso (39.98), 16:0(4.37), 16:0 iso (4.9), 17:1 iso w10c (1.06), 17:0 iso (13.19), 17:0 anteiso (14.62)                                                                                                                                                                                      | <i>Bacillus-subtilis</i>                 | 0.513 |
| G20 | <i>Brevundimonas diminuta</i>       | 93  | KX343979 | 12:0 3OH (2.38), 14:0(1.29), 16:0(26.01), 17:1 w8c (1.58), 18:0(1.66), 19:0 cyclo w8c (2.37), Sum In Feature 3 (16:1 w7c/16:1 w6c) (2.45), Sum In Feature 8 (18:1 w7c) (57.52)                                                                                                                                                         | <i>Brevundimonas-diminuta</i>            | 0.607 |
| G21 | <i>Bacillus sp.</i>                 | 100 | KX343980 | 13:0 iso (5.67), 13:0 anteiso (2.05), 14:0 iso (4.88), 15:0 iso (17.63), 15:0 anteiso (7.83), 16:0(8.54), 17:1 iso w10c (2.91), 17:1 iso w5c (3.54), 17:1 anteiso A (1.4), 17:0 iso (10.35), 17:0 anteiso (4.07), 18:0 (2.03), Sum In Feature 2 (14:0 3OH/16:1 iso I) (2.26), Sum In Feature 3 (16:1 w7c/16:1 w6c) (7.92)              | <i>Bacillus thuringiensis</i>            | 0.621 |
| G22 | <i>Bacillus cereus</i>              | 99  | KX343981 | 13:0 iso (6.48), 13:0 anteiso (1.02), 14:0(2.86), 14:0 iso (3.5), 15:0 iso (31.14), 15:0 anteiso (5.38), 16:0(5.21), 16:0 iso (7.42), 17:1 iso w10c (1.75), 17:1 iso w5c (4.92), 17:1 anteiso A (1.44), 17:0 iso (10.98), 17:0 anteiso (2.44), Sum In Feature 3 (16:1 w7c/16:1 w6c) (8.54)                                             | <i>Bacillus-cereus-GC subgroup B</i>     | 0.605 |
| G23 | <i>Staphylococcus saprophyticus</i> | 100 | KX343982 | 14:0(1.10), 14:0 iso (1.88), 15:0 iso (21.9), 15:0 anteiso (41.9), 16:0(3.57), 16:0 iso (1.94), 17:0 iso (6.56), 17:0 anteiso (18.43), 18:0(5.57), 20:00 (9.24)                                                                                                                                                                        | <i>Staphylococcus-cohnii-cohnii</i>      | 0.601 |
| G24 | <i>Bacillus thuringiensis</i>       | 99  | KX343983 | 13:0 iso (10.52), 13:0 anteiso (1.45), 14:0(4.02), 14:0 iso (5.04), 15:0 iso (32.04), 15:0 anteiso (5.79), 16:0(3.77), 16:0 iso (5.48), 17:1 iso w10c (1.5), 17:1 iso w5c (4.21), 17:1 anteiso A (1), 17:0 iso (6.21), 17:0 anteiso (1.31), Sum In Feature 2 (14:0 3OH/16:1 iso I) (3.35), Sum In Feature 3 (16:1 w7c/16:1 w6c) (9.33) | <i>Bacillus thuringiensis</i>            | 0.723 |

|     |                           |     |          |                                                                                                                                                                                                                                                                                                                                                    |                                                |       |
|-----|---------------------------|-----|----------|----------------------------------------------------------------------------------------------------------------------------------------------------------------------------------------------------------------------------------------------------------------------------------------------------------------------------------------------------|------------------------------------------------|-------|
| G25 | <i>Bacillus sp.</i>       | 100 | KX343984 | 13:0 iso (12.23), 13:0 anteiso (1.52), 14:0(4.15), 14:0 iso (4.84), 15:0 iso (36.44), 15:0 anteiso (4.99), 16:0(3.67), 16:0 iso (5.28), 17:1 iso w10c (1.5), 17:1 iso w5c (4.26), 17:0 iso (5.98), 17:0 anteiso (1.03), Sum In Feature 2 (14:0 3OH/16:1 iso I) (3.85), Sum In Feature 3 (16:1 w7c/16:1 w6c) (7.59)                                 | <i>Bacillus-thuringiensis</i>                  | 0.611 |
| G26 | <i>Bacillus sp.</i>       | 100 | KX343985 | 13:0 iso (12.23), 13:0 anteiso (1.52), 14:0(4.15), 14:0 iso (4.84), 15:0 iso (34.94), 15:0 anteiso (5.09), 16:0(3.67), 16:0 iso (6.24), 17:1 iso w10c (1.5), 17:1 iso w5c (4.26), 17:0 iso (5.21), 17:0 anteiso (1.03)                                                                                                                             | <i>Bacillus-thuringiensis</i>                  | 0.634 |
| G27 | <i>Bacillus sp.</i>       | 100 | KX343986 | 13:0 iso (6.48), 13:0 anteiso (1.02), 14:0(2.86), 14:0 iso (3.5), 15:0 iso (31.14), 15:0 anteiso (5.38), 16:00(5.21), 16:0 iso (7.42), 17:1 iso w10c (1.75), 17:1 iso w5c (4.92), 17:1 anteiso A (1.44), 17:0 iso(10.98), 17:0 anteiso (2.44), Sum In Feature 3 (16:1 w7c/16:1 w6c) (8.54)                                                         | <i>Bacillus-cereus-GC subgroup B</i>           | 0.589 |
| G28 | <i>Bacillus cereus</i>    | 98  | KX343987 | 13:0 iso (7.05), 13:0 anteiso (1.04), 14:0(3.8), 14:0 iso (3.84), 15:0 iso (33.93), 15:0 anteiso (4.83), 16:0(4.66), 16:0 iso (5.46), 17:1 iso w10c (2.47), 17:1 iso w5c (4.98), 17:0 iso (8.43), 17:0 anteiso (1.51), Sum In Feature 2 (14:0 3OH/16:1 iso I) (2.55), Sum In Feature 3 (16:1 w7c/16:1 w6c) (9.19)                                  | <i>Bacillus-cereus-GC subgroup A</i>           | 0.741 |
| G29 | <i>Bacillus sp.</i>       | 99  | KX343988 | 13:0 iso (5.67), 13:0 anteiso (2.05), 14:0 iso (4.88), 15:0 iso (17.63), 15:0 anteiso (7.83), 16:1 w7c alcohol (1.24), 16:0(8.54), 17:1 iso w10c (2.91), 17:1 iso w5c (3.54), 17:1 anteiso A (1.4), 17:0 iso (10.35), 17:0 anteiso (4.07), 18:0(2.03), Sum In Feature 2 (14:0 3OH/16:1 iso I) (2.26), Sum In, Feature 3 (16:1 w7c/16:1 w6c) (7.92) | <i>Bacillus-cereus-GC subgroup A</i>           | 0.648 |
| G30 | <i>Staphylococcus sp.</i> | 99  | KX343989 | 14:0(1.10), 14:0 iso (1.88), 15:0 iso (21.9), 15:0 anteiso (41.9), 16:0(3.57), 16:0 iso (1.94), 17:0 iso (6.56), 17:0 anteiso (18.43), 18:0(5.57), 20:00 (9.24)                                                                                                                                                                                    | <i>Staphylococcus saprophyticus</i>            | 0.421 |
| G31 | <i>Bacillus sp.</i>       | 96  | KX343990 | 14:0(1.3), 14:0 iso (2.67), 15:0isoG (0.03), 15:0 iso (11.22), 15:0 anteiso (71.72), 16:0(1.34), 16:0 iso(5.88), 17:1 anteiso (3.59)                                                                                                                                                                                                               | <i>Brevibacillus-choshinensis</i>              | 0.671 |
| G32 | <i>Bacillus cereus</i>    | 99  | KX343991 | 13:00 (7.11), 13:0 iso (1.14), 14:0(3.9), 14:0 iso (4.9), 15:0(28.23), 15:0 iso (5.52), 16:1 w7c alcohol (1.31), 16:0(4.97), 16:0 iso (7.15), 16:1 iso I (2.99), 17:1 iso w10c (3.84), 17:1 iso w5c (4.71), 17:0 iso (8.16), 17:0 anteiso (1.6), Sum In Feature 3 (16:1 w7c/16:1 w6c) (9.11)                                                       | <i>Bacillus-cereus-GC subgroup A</i>           | 0.741 |
| G33 | <i>Bacillus subtilis</i>  | 100 | KX343992 | 15:0 iso (27.5), 15:0 anteiso (43.83), 15:1 w5c (1.96), 16:1 w11c (1.49), 16:0(2.45), 16:0 iso (2.85), 17:1 iso w10c (3.38), 17:0 iso (4.45), 17:0 anteiso (6.52), Sum In Feature 4(17:1 iso I/anteiso B) (2.52)                                                                                                                                   | <i>Bacillus-subtilis</i>                       | 0.529 |
| G34 | <i>Bacillus sp.</i>       | 99  | KX343993 | 14:0 iso (1.35), 15:0 iso (37.92), 15:0 anteiso (32.91), 16:0(1.77), 16:0 iso (4.85), 17:0 iso (9.75), 17:0 anteiso (8.28)                                                                                                                                                                                                                         | <i>Bacillus-licheniformis</i>                  | 0.534 |
| G35 | <i>Bacillus sp.</i>       | 99  | KX343994 | 14:0 (3.35), 15:0 iso (41.68), 15:0 anteiso (10.41). 16:1 w7c alcohol (13.34), 16:1 w11c (2.09) 16:0 iso (14.21), 17:1 iso w10c (1.23), 17:0 iso (3.47), 17:0 anteiso (2.68), Sum In Feature 4(17:1 iso I/anteiso B) (1.54)                                                                                                                        | <i>Lysinibacillus-sphaericus-GC subgroup E</i> | 0.527 |
| G36 | <i>Enterobacter sp.</i>   | 99  | KX343995 | 12:0 (1.76), 13:00 (2.08), 14:0(8.58), 14:0 3OH (8.14), 16:0(21.99), 17:00 (5.35), 17:0 cyclo (18.16), 19:0 cyclo w8c (3.33), Sum in feature 1 (13:0 3OH/15:1 iso H) (2.71), Sum In Feature 3 (16:1 w7c/16:1 w6c) (7.96), Sum In Feature 8 (18:1 w7c) (13.55)                                                                                      | <i>Enterobacter-hormaechei</i>                 | 0.545 |

|     |                                     |     |          |                                                                                                                                                                                                                                                                                                       |                                                       |       |
|-----|-------------------------------------|-----|----------|-------------------------------------------------------------------------------------------------------------------------------------------------------------------------------------------------------------------------------------------------------------------------------------------------------|-------------------------------------------------------|-------|
| G37 | <i>Bacillus cereus</i>              | 99  | KX343996 | 13:0 iso (7.11), 13:0 anteiso (1.14), 14:0(3.9), 14:0 iso (4.9), 15:0 iso (30.23), 15:0 anteiso (5.52), 16:1 w11c (0.49), 16:0(4.97), 16:0 iso (7.15), 16:1 iso I (2.99), 17:1 iso w10c (3.84), 17:1 iso w5c (4.71), 17:0 iso (8.16), 17:0 anteiso (1.6), Sum In Feature 3 (16:1 w7c/16:1 w6c) (9.11) | <i>Bacillus-cereus-GC subgroup A</i>                  | 0.621 |
| G38 | <i>Bacillus sp.</i>                 | 100 | KX344029 | 14:0 iso (1.22), 15:0 iso (50.47), 15:0 anteiso (23.92), 16:0(2.54), 16:0 iso (3.5), 17:1 iso w10c (1.4), 17:0 iso (7.11), 17:0 anteiso (6.85)                                                                                                                                                        | <i>Bacillus-pumilus-</i>                              | 0.772 |
| G39 | <i>Lysinibacillus sphaericus</i>    | 100 | KX344027 | 14:0 iso (3.35), 15:0 iso (41.68), 15:0 anteiso (10.41), 16:1 w7c alcohol (13.34), 16:1 w11c (2.09), 16:0 iso (14.21), 17:1 iso w10c (1.23), 17:1 anteiso (1.54), 17:0 iso (3.47), 17:0 anteiso (2.68)                                                                                                | <i>Lysinibacillus-sphaericus-GC subgroup E</i>        | 0.696 |
| G40 | <i>Alcaligenes sp.</i>              | 99  | KX344028 | 12:0 (3.22), 12:0 2OH (2.24), 14:0(1.09), 14:0 3OH (8.2), 16:0(36.1), 17:00 (10.24), 17:0 cyclo (1.06), 18:01 (1.1), 19:0 cyclo w8c (8.44), 20:0 (29.35)                                                                                                                                              | <i>Alcaligenes faecalis</i>                           | 0.526 |
| G41 | <i>Lysinibacillus sp.</i>           | 98  | KX343997 | 14:0 iso (3.73), 15:0 iso (42.54), 15:0 anteiso (10.01), 16:1 w7c alcohol (14.12), 16:1 w11c (2.09), 16:0 iso (14.21), 17:1 iso w10c (1.23), 17:1 anteiso (1.54), 17:0 iso (3.47), 17:0 anteiso (2.68)                                                                                                | <i>Lysinibacillus-sphaericus-GC subgroup E</i>        | 0.524 |
| G42 | <i>Enterobacter sp.</i>             | 99  | KX343998 | 12:0 (1.76), 13:00 (2.08), 14:0(10.11), 14:0 3OH (8.14), 16:0(21.99), 17:00 (5.35), 17:0 cyclo (18.16) 19:0 cyclo w8c (3.33), Sum in feature 1 (13:0 3OH/15:1 iso H) (3.08), Sum In Feature 3 (16:1 w7c/16:1 w6c) (7.96), Sum In Feature 8 (18:1 w7c) (13.55)                                         | <i>Enterobacter-hormaechei</i>                        | 0.545 |
| G43 | <i>Bacillus sp.</i>                 | 98  | KX343999 | 14:0 iso (1.63), 15:0 iso (33.58), 15:0 anteiso (39.11), 16:1 w7c alcohol (2.55), 16:1 w11c (1.27), 16:0(1.42), 16:0 iso (3.09), 17:1 iso w10c (2.73), 17:0 iso (3.06), 17:0 anteiso (6.34), Sum In Feature 4(17:1 iso I/anteiso B) (2.66)                                                            | <i>Bacillus subtilis</i>                              | 0.621 |
| G44 | <i>Bacillus pumilus</i>             | 100 | KX344000 | 14:0 iso (1.07), 15:0 iso (43.24), 15:0 anteiso (24.23), 16:0(2.46), 16:0 iso (3.91), 17:1 iso w10c (2.05), 17:0 iso (11.24), 17:0 anteiso (7.11)                                                                                                                                                     | <i>Bacillus pumilus</i>                               | 0.656 |
| G45 | <i>Bacillus subtilis</i>            | 99  | KX344001 | 14:0(1.3), 14:0 iso (3.56), 15:0 iso (32.1), 15:0 anteiso (37.64), 16:1 w7c alcohol (1.06), 16:1 w11c (2.57), 16:0(3.27), 16:0 iso (2.12), 17:0 iso (4.07), 17:0 anteiso (5.52), 18:0 (1.01), Sum In Feature 4(17:1 iso I/anteiso B) (1.17)                                                           | <i>Bacillus subtilis</i>                              | 0.659 |
| G46 | <i>Staphylococcus saprophyticus</i> | 100 | KX344002 | 14:0 (1.12), 14:0 iso (1.37), 15:0 iso (27.9), 15:0 anteiso (37.9), 16:0(3.57),16:0 iso (1.94), 17:0 iso (6.56), 17:0 anteiso (17.69), 18:0 (5.57), 19:0 iso (0:14), 20:0 (9.24)                                                                                                                      | <i>Staphylococcus saprophyticus</i>                   | 0.619 |
| G47 | <i>Klebsiella pneumoniae</i>        | 99  | KX344003 | 12:0 (2.18), 14:0(10.58), 14:0 3OH (9.29), 16:0 (24.59), 17:00 (1.97), 17:0 cyclo (12.45), 19:0 cyclo w8c (1.15), Sum In Feature 3 (16:1 w7c/16:1 w6c) (12.32), Sum In Feature 8 (18:1 w7c) (22.31)                                                                                                   | <i>Klebsiella-pneumoniae-pneumoniae-GC subgroup B</i> | 0.679 |
| G48 | <i>Bacillus sp.</i>                 | 100 | KX344004 | 14:0 iso (3.35), 15:0 iso (41.68), 15:0 anteiso (10.41), 16:1 w7c alcohol (13.34), 16:1 w11c (1.89), 16:0 iso (14.21), 17:1 iso w10c (1.23), 17:1 anteiso (1.54), 17:0 iso (3.47), 17:0 anteiso (2.68)                                                                                                | <i>Lysinibacillus-sphaericus-GC subgroup E</i>        | 0.436 |
| G49 | <i>Bacillus subtilis</i>            | 99  | KX344005 | 15:0 iso (27.5), 15:0 anteiso (44.01), 15:1 w5c (2.06), 16:1 w11c (1.59), 16:0 (2.45), 16:0 iso (2.85) 17:1 iso w10c (2.38), 17:0 iso (4.45), 17:0 anteiso (8.52), Sum In Feature 4(17:1 iso I/anteiso B) (2.52)                                                                                      | <i>Bacillus subtilis</i>                              | 0.568 |

|     |                              |     |          |                                                                                                                                                                                                                                                                                               |                                                |       |
|-----|------------------------------|-----|----------|-----------------------------------------------------------------------------------------------------------------------------------------------------------------------------------------------------------------------------------------------------------------------------------------------|------------------------------------------------|-------|
| G50 | <i>Lysinibacillus sp.</i>    | 100 | KX344006 | 14:0(3.35), 15:0 iso (41.68), 15:0 anteiso (10.41), 16:1 w7c alcohol (13.34), 16:1 w11c (2.09), 16:0 iso (14.21), 17:1 iso w10c (1.23), 17:0 iso (3.47), 17:0 anteiso (2.68), 18:01 (1.54)                                                                                                    | <i>Lysinibacillus-sphaericus-GC subgroup E</i> | 0.556 |
| G51 | <i>Alcaligenes sp.</i>       | 100 | KX344007 | 12:0(3.22), 12:0 2OH (2.24), 14:0 (1.09), 14:0 3OH (8.2), 16:0 (36.1), 17:0 (9.48), 17:0 cyclo (1.04), 18:1 (1.1), 20:00 (9.69), Sum In Feature 2 (14:0 3OH/16:1 iso I) (29.35)                                                                                                               | <i>Alcaligenes faecalis</i>                    | 0.329 |
| G52 | <i>Brevundimonas sp.</i>     | 100 | KX344008 | 12:0 3OH (2.26), 14:0(1.01), 16:0(25.37), 18:01 (61.13), Sum In Feature 2 (14:0 3OH/16:1 iso I) (1.87), Sum In Feature7 (5.21)                                                                                                                                                                | <i>Brevundimonas-diminuta</i>                  | 0.545 |
| G53 | <i>Staphylococcus sciuri</i> | 100 | KX344009 | 13:0 iso (1.22), 14:0 iso (1.22), 15:0(49.47), 15:0 iso (23.92), 16:0(2.68),16:0 iso (3.5), 17:1 iso w10c (1.4), 17:1 w8c (7.91), 17:0 iso (3.85)                                                                                                                                             | <i>Staphylococcus sciuri</i>                   | 0.572 |
| G54 | <i>Bacillus safensis</i>     | 98  | KX344010 | 12:0 antiiso (1.16), 14:0 (1.03), 14:0 iso (1.66), 15:0(11.65), 15:0 iso (34.57), 16:1 w11c (1.03), 16:0(8), 16:0 iso (4.91), 17:1 w8c (10.52), 17:0 iso (13.78), 17:0 cyclo (1.8)                                                                                                            | <i>Bacillus-subtilis</i>                       | 0.235 |
| G55 | <i>Escherichia coli</i>      | 100 | KX344011 | 12:0(2.18), 13:0 (0.51), 14:0(10.58), 16:0(24.59), 16:0 iso (0.03), 17:0 anteiso (1.97), 17:00 (12.45) 18:01 (22.31), 19:0 anteiso (1.15), 20:00 (9.29), Sum In Feature 2 (14:0 3OH/16:1 iso I) (12.32)                                                                                       | <i>Escherichia-fergusonii-GC subgroup A</i>    | 0.628 |
| G56 | <i>Lysinibacillus sp.</i>    | 100 | KX344012 | 14:0(3.35), 15:0 iso (41.68), 15:0 anteiso (10.41), 16:1 w7c alcohol (13.34), 16:1 w11c (2.09), 16:0 iso (14.21)                                                                                                                                                                              | <i>Lysinibacillus fusiformis</i>               | 0.671 |
| G57 | <i>Bacillus subtilis</i>     | 100 | KX344013 | 15:0(27.5), 15:0 iso (43.83), 15:1 w5c (1.96), 16:1 w11c (1.49), 16:0 (2.45), 16:0 iso (2.85), 17:1 iso w10c (3.38), 17:1 w8c (4.45), 17:0 iso (6.52), Sum In Feature 3 (16:1 w7c/16:1 w6c) (2.52)                                                                                            | <i>Bacillus subtilis</i>                       | 0.715 |
| G58 | <i>Aeromonas sobria</i>      | 100 | KX344014 | 12:0 (5.1), 13:0 iso (2.4), 14:0 (2.8), 15:0isoG (1.7), 15:0(4.5), 15:0 anteiso (5.2), 16:1 w7c alcohol (1.7), 16:0 (10.5), 16:0 iso (2.7),17:1 anteiso B (2.2), 17:1 w8c (7.6), 17:0 anteiso (1.1), 18:01 (10.2), 20:0 (5.4),Iso 17:1 w9c (5.5), Sum In Feature 2 (14:0 3OH/16:1 iso I) (24) | <i>Aeromonas sobria</i>                        | 0.529 |
| G59 | <i>Staphylococcus sp.</i>    | 100 | KX344015 | 14:0 iso (1.55), 15:0 (8.57), 15:0 iso (45.97), 16:0(1.32),17:1 w8c (7.38), 17:0 iso (13.8), 17:00 (4.26),18:0 (1.57),19:0 iso (5.19), 19:0 cyclo w8c (1.17), Sum In Feature 8 (18:1 w7c) (4.13)                                                                                              | <i>Staphylococcus-hominis-hominis</i>          | 0.507 |
| G60 | <i>Bacillus pumilus</i>      | 100 | KX344016 | 8:0 3OH (1.03), 14:0 iso (1.07), 15:0 (43.24), 15:0 iso (24.23), 16:1 w7c alcohol (0.61), 16:0 (2.46), 16:0 iso (3.91), 17:1 iso w10c (2.05), 17:1 w8c (11.24), 17:0 iso (7.11)                                                                                                               | <i>Bacillus pumilus</i>                        | 0.528 |
| G61 | <i>Bacillus invictae</i>     | 100 | KX344017 | 14:0 iso (1.12), 15:0 iso (41.61), 15:0 anteiso (24.04), 16:0 (2.48), 16:0 iso (3.27), 17:1 iso w10c (2.1), 17:1 w8c (12.46), 17:0 iso (7.24)                                                                                                                                                 | <i>Bacillus-pumilus-GC subgroup B</i>          | 0.585 |
| G62 | <i>Bacillus invictae</i>     | 100 | KX344018 | 14:0 iso (1.26), 15:0 iso (43.61), 15:0 anteiso (24.14), 16:0(2.48), 16:0 iso (3.57), 17:1 iso w10c (1.99), 17:1 w8c (12.01), 17:0 iso (7.24)                                                                                                                                                 | <i>Bacillus-pumilus-GC subgroup B</i>          | 0.428 |
| G63 | <i>Bacillus invictae</i>     | 100 | KX344019 | 14:0 iso (1.16), 15:0 iso (42.21), 15:0 anteiso (27.14), 16:0 (2.48), 16:0 iso (2.98), 17:1 iso w10c (2.13), 17:1 w8c (12.88), 17:0 iso (7.24)                                                                                                                                                | <i>Bacillus-pumilus-GC subgroup B</i>          | 514   |
| G64 | <i>Bacillus invictae</i>     | 100 | KX344020 | 14:0 iso (1.11), 15:0 iso (43.28), 15:0 anteiso (22.44), 16:0(2.48), 16:0 iso (4.01), 17:1 iso w10c (2.34), 17:1 w8c (12.56), 17:0 iso (7.24)                                                                                                                                                 | <i>Bacillus-pumilus-GC subgroup B</i>          | 0.527 |

|     |                             |     |          |                                                                                                                                                                                                                                                                                              |                                       |       |
|-----|-----------------------------|-----|----------|----------------------------------------------------------------------------------------------------------------------------------------------------------------------------------------------------------------------------------------------------------------------------------------------|---------------------------------------|-------|
| G65 | <i>Bacillus invictae</i>    | 99  | KX344021 | 14:0 iso (1.05), 15:0 iso (44.02), 15:0 anteiso (20.89), 16:0(2.48), 16:0 iso (4.12), 17:1 iso w10c (2.22), 17:1 w8c (12.23), 17:0 iso (7.24)                                                                                                                                                | <i>Bacillus-pumilus-GC subgroup B</i> | 0.488 |
| G66 | <i>Bacillus altitudinis</i> | 100 | KX344022 | 14:0 iso (1.06), 15:0 iso (43.24), 15:0 anteiso (23.84), 16:0 (2.48), 16:0 iso (3.76), 17:1 iso w10c (2.16), 17:1 w8c (10.87), 17:0 iso (7.24)                                                                                                                                               | <i>Bacillus-pumilus-GC subgroup B</i> | 0.598 |
| G67 | <i>Brevundimonas sp.</i>    | 100 | KX344023 | 12:0 3OH (2.38), 14:0 (1.29), 15:1 w5c (1.98), 16:0 (26.01), 17:1 anteiso B (1.58), 17:0 cyclo (1.66) 18:01 (55.52), 19:0 anteiso (2.37), Sum In Feature 2 (14:0 3OH/16:1 iso I) (2.45)                                                                                                      | <i>Brevundimonas-vesicularis</i>      | 0.594 |
| G68 | <i>Alcaligenes faecalis</i> | 100 | KX344024 | 12:0 (3.22), 12:0 2OH (2.24), 14:0 (1.09), 14:0 3OH (8.2), 16:0 (36.1), 17:00 (9.48), 17:0 cyclo (1.04) 18:01 (1.1), 20:0 (8.44), Sum In Feature 2 (14:0 3OH/16:1 iso I) 29.35)                                                                                                              | <i>Alcaligenes faecalis</i>           | 0.518 |
| G69 | <i>Aeromonas popoffii</i>   | 99  | KX344025 | 12:0 (5.1),13:0 iso (2.4), 14:0(2.8), 15:0isoG (1.7), 15:0 (4.5), 15:0 anteiso (5.2),16:1 w7c alcohol (1.7), 16:0(10.5), 16:0 iso (2.7), 17:1 anteiso (2.2), 17:1 w8c (7.6), 17:0 anteiso (1.1), 18:01 (10.2), 20:00 (5.4), Iso 17:1 w9c (6.29), Sum In Feature 2 (14:0 3OH/16:1 iso I) (24) | <i>Aeromonas popoffii</i>             | 0.621 |
| G70 | <i>Bacillus aerophilus</i>  | 100 | KX344026 | 14:0 iso (1.07), 15:0(43.77), 15:0 iso (24.51), 16:0(2.47), 16:0 iso (3.96), 17:1 iso w10c (2.07), 17:1 w8c (11.36), 17:0 iso (7.19)                                                                                                                                                         | <i>Bacillus-pumilus-GC subgroup B</i> | 0.593 |

<sup>a</sup>Number inside the parenthesis indicates the amount of FAME in percentage

**Table 3:** PLFA analysis of the soil samples (BACTYPE)

| <sup>a</sup> Peak Name | Sample Code |             |             |              |              |              |              |              |              |              |             |              |             |             |              |
|------------------------|-------------|-------------|-------------|--------------|--------------|--------------|--------------|--------------|--------------|--------------|-------------|--------------|-------------|-------------|--------------|
|                        | S1          | S2          | S3          | S4           | S5           | S6           | S7           | S8           | S9           | S10          | S11         | S12          | S13         | S14         | control      |
| <b>AM Fungi</b>        | ND          | ND          | 0.19        | ND           | ND          | ND           | ND          | ND          | 0.12         |
| <b>Gram Negative</b>   | <b>2.85</b> | <b>4.57</b> | <b>6.89</b> | <b>5.72</b>  | <b>3.49</b>  | <b>5.23</b>  | <b>4.48</b>  | <b>1.71</b>  | <b>1.89</b>  | <b>4.17</b>  | <b>8.71</b> | <b>10.91</b> | <b>7.87</b> | <b>0.09</b> | <b>10.70</b> |
| <b>Methanotroph</b>    | 0.23        | ND          | ND          | 0.36         | 0.81         | ND           | ND           | ND           | ND           | 0.70         | ND          | ND           | 0.16        | 8.30        | ND           |
| <b>Eukaryote</b>       | 89.26       | 83.51       | 77.48       | 67.98        | 76.00        | 70.35        | 30.00        | 0.20         | 0.16         | 0.99         | 83.46       | 77.31        | 82.88       | 82.81       | 80.40        |
| <b>Fungi</b>           | 0.35        | 0.64        | 1.14        | 0.45         | 0.61         | ND           | ND           | 0.94         | 0.40         | ND           | 0.22        | 1.21         | 0.95        | 0.71        | ND           |
| <b>Gram Positive</b>   | <b>4.31</b> | <b>6.31</b> | <b>7.92</b> | <b>13.32</b> | <b>11.67</b> | <b>19.09</b> | <b>54.88</b> | <b>91.76</b> | <b>91.49</b> | <b>84.39</b> | <b>2.97</b> | <b>5.24</b>  | <b>2.94</b> | <b>3.14</b> | <b>3.50</b>  |
| <b>Anaerobe</b>        | 2.83        | 4.64        | 5.62        | 6.38         | 2.19         | 5.33         | 5.20         | 1.39         | 2.03         | 3.53         | 3.32        | 3.69         | 3.16        | 4.81        | 3.94         |
| <b>Actinomycetes</b>   | 0.18        | 0.33        | 0.76        | 5.79         | 5.23         | ND           | 5.45         | 4.00         | 4.04         | 6.22         | 1.32        | 1.64         | 2.03        | 0.14        | 1.34         |

<sup>a</sup> Peak name represents type of organism and the amounts are given in percentage, ND: Not detected

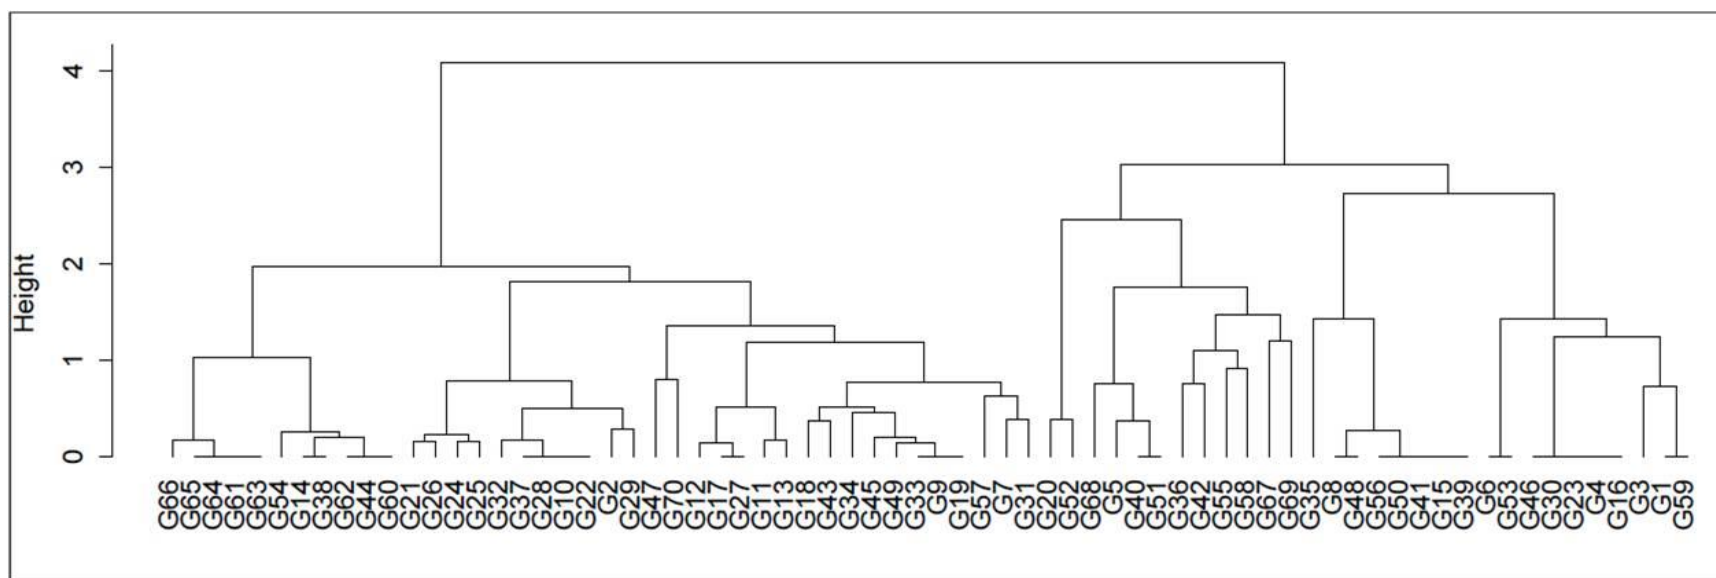

**Fig. S1** Cluster dendrogram of the isolates based on their biochemical and carbohydrate utilization profile

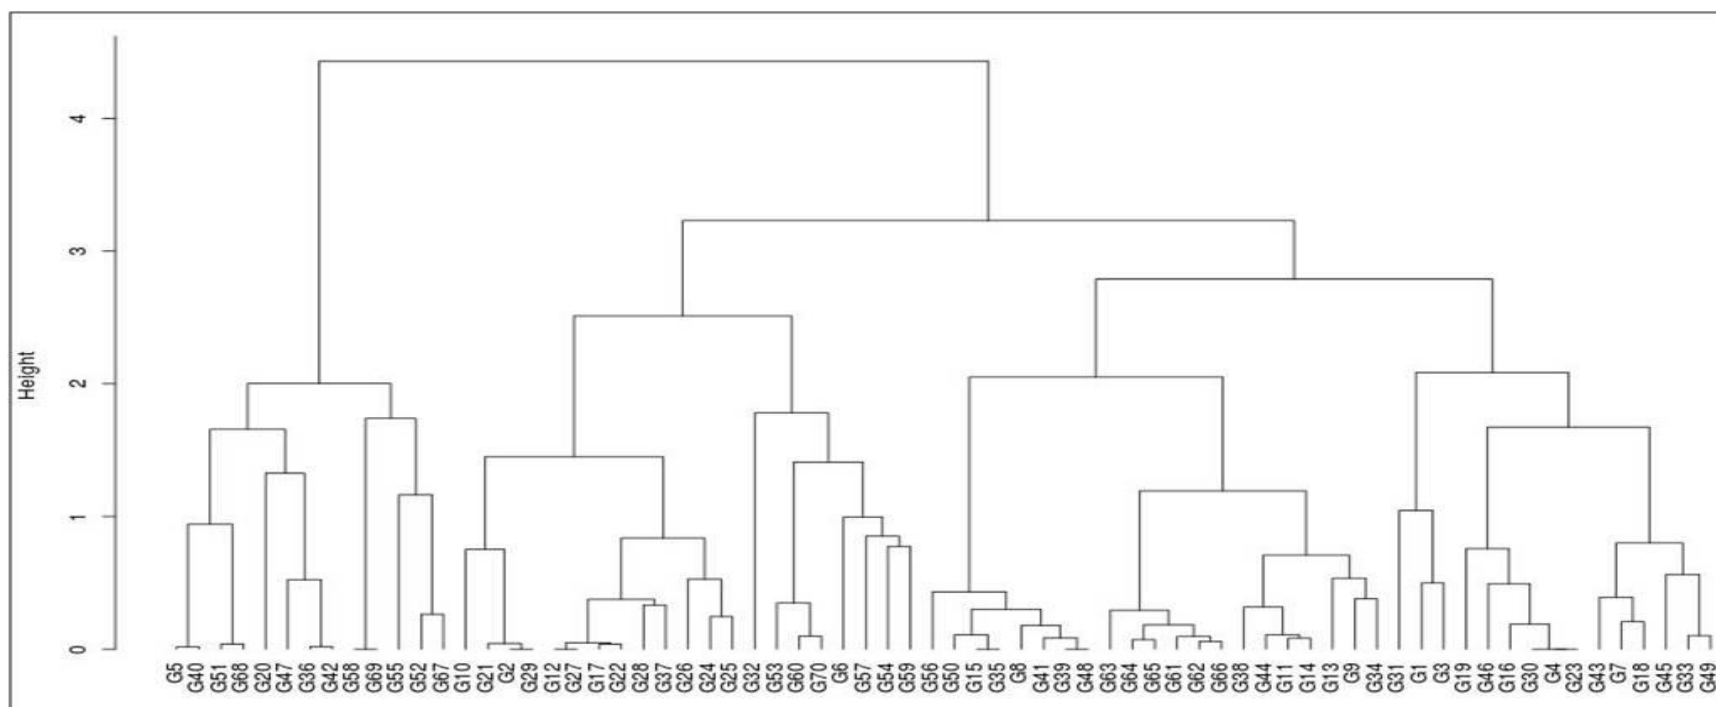

**Fig. S2** Cluster analysis based on the major FAMES of the isolates



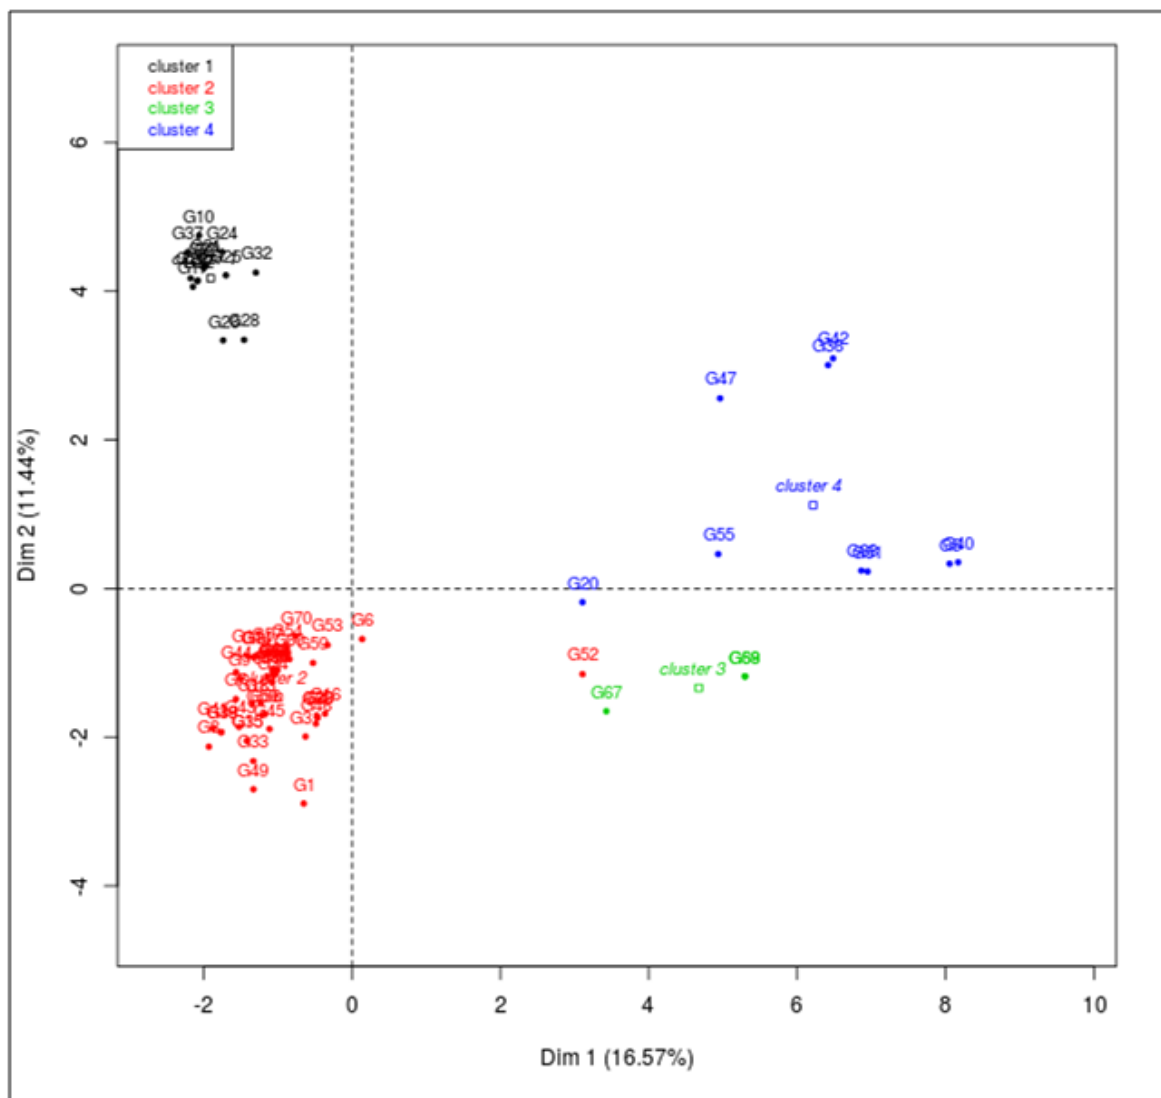

**Fig. S3** Cluster dendrogram of the isolates based on their major FAMES
